# Supplementary material for: Improving fragment-based ab initio protein structure assembly using low-accuracy contact-map predictions
Source: PubMed Central journal article supplement (PMC8373938; doi:10.1038/s41467-021-25316-w), 2021-08-18
Supplement: 41467_2021_25316_MOESM3_ESM.pdf [file 41467_2021_25316_MOESM3_ESM.pdf]

## **Description of Additional Supplementary Files**

File Name: Supplementary Data 1

Description: PDB IDs of 243 Training Proteins

File Name: Supplementary Data 2

Description: PDB IDs of 247 Test Proteins

File Name: Supplementary Data 3

Description: CASP IDs of 64 Targets from CASP13
